# Supplementary material for: The miR‐193a‐3p‐MAP3k3 Signaling Axis Regulates Substrate Topography‐Induced Osteogenesis of Bone Marrow Stem Cells
Source: PubMed Central journal article supplement (PMC6947707; doi:10.1002/advs.201901412), 2019-11-13
Supplement: ADVS-7-1901412-s001.pdf [file ADVS-7-1901412-s001.pdf]

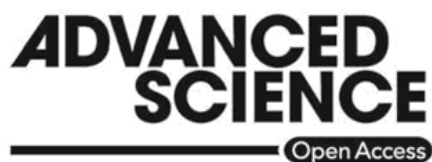

## Supporting Information

for *Adv. Sci.*, DOI: 10.1002/adv.201901412

**The miR-193a-3p-MAP3k3 Signaling Axis Regulates  
Substrate Topography-Induced Osteogenesis of Bone Marrow  
Stem Cells**

*Yan Lv, Ying Huang, Mingming Xu, Boon Chin Heng,  
Congchong Yang, Cen Cao, Zhewen Hu, Wenwen Liu, Xiaopei  
Chi, Min Gao, Xuehui Zhang, Yan Wei, and Xuliang Deng\**

*Supplementary information*

## **The miR-193a-3p-MAP3k3 signaling axis regulates substrate topography-induced osteogenesis of bone marrow stem cells**

*Yan Lv, Ying Huang, Mingming Xu, Boon Chin Heng, Congchong Yang, Cen Cao, Zhewen Hu, Wenwen Liu, Xiaopei Chi, Min Gao, Xuehui Zhang, Yan Wei, and Xuliang Deng\**

Dr. Y. Lv, Dr. Y. Huang, Dr. M. Xu, Prof. B. C. Heng, Dr. Z. Hu, Dr. X. Chi, Dr. M. Gao, Dr. W. Liu, Prof. Y. Wei and Prof. X. Deng

Department of Geriatric Dentistry, NMPA Key Laboratory for Dental Materials, National Engineering Laboratory for Digital and Material Technology of Stomatology, Beijing Laboratory of Biomedical Materials, Peking University School and Hospital of Stomatology, Beijing 100081, PR China.

Dr. C. Yang

Department of Cariology and Endodontology, Peking University School and Hospital of Stomatology, Beijing 100081, P. R. China.

Dr. C. Cao

Department of Stomatology, Union Hospital, Tongji Medical College, Huazhong University of Science and Technology, Wuhan 430022, China.

Dr. X. Zhang

Department of Dental Materials & Dental Medical Devices Testing Center, Peking University School and Hospital of Stomatology, Beijing 100081, P. R. China.

Dr. Y. Lv and Dr. Y. Huang contributed equally to this paper.

\*Corresponding author: Prof. Xuliang Deng, Department of Geriatric Dentistry, Peking University School and Hospital of Stomatology, 22# Zhongguancun South Ave, Haidian District, Beijing, 100081, P.R. China

Phone: 86 10-82195637

Fax: 86 10-82195581

Email: kqdengxuliang@bjmu.edu.cn

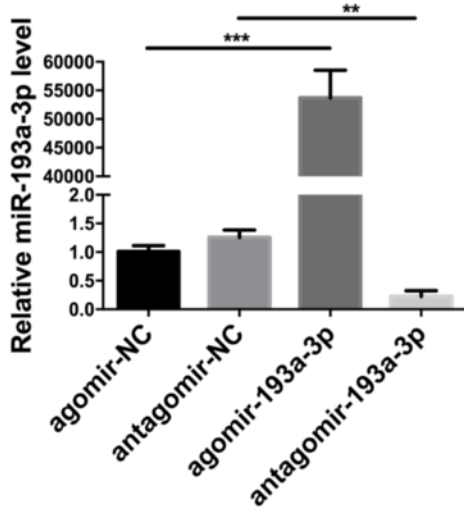

**Supplementary Fig. 1.** The expression of miR-193a-3p at 48 hours post-transfection in basal medium. Results are presented as means  $\pm$  SEM (n = 3). \*\* $p < 0.01$ , \*\*\* $p < 0.001$ , \* by two-sample *t*-test.

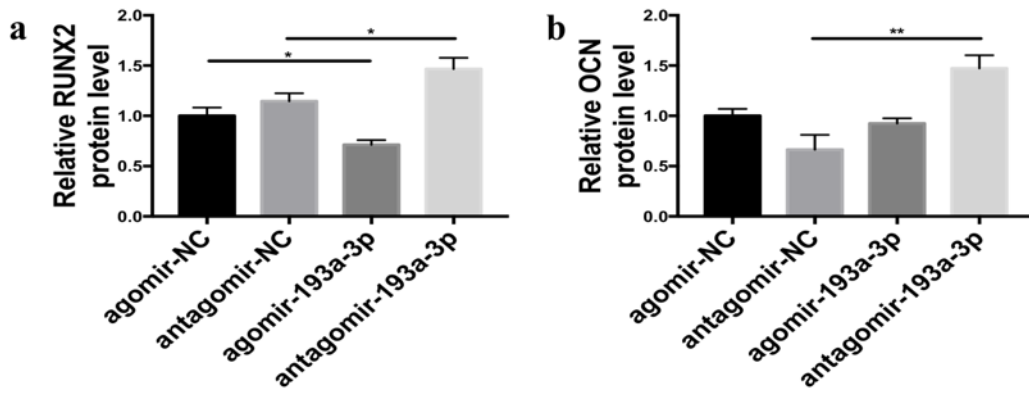

**Supplementary Fig. 2.** Quantitative analysis of the protein expression levels of RUNX2 (a) and OCN (b). Results are presented as means  $\pm$  SEM ( $n = 3$ ). \* $p < 0.05$ , \*\* $p < 0.01$ , \* by two-sample t-test.

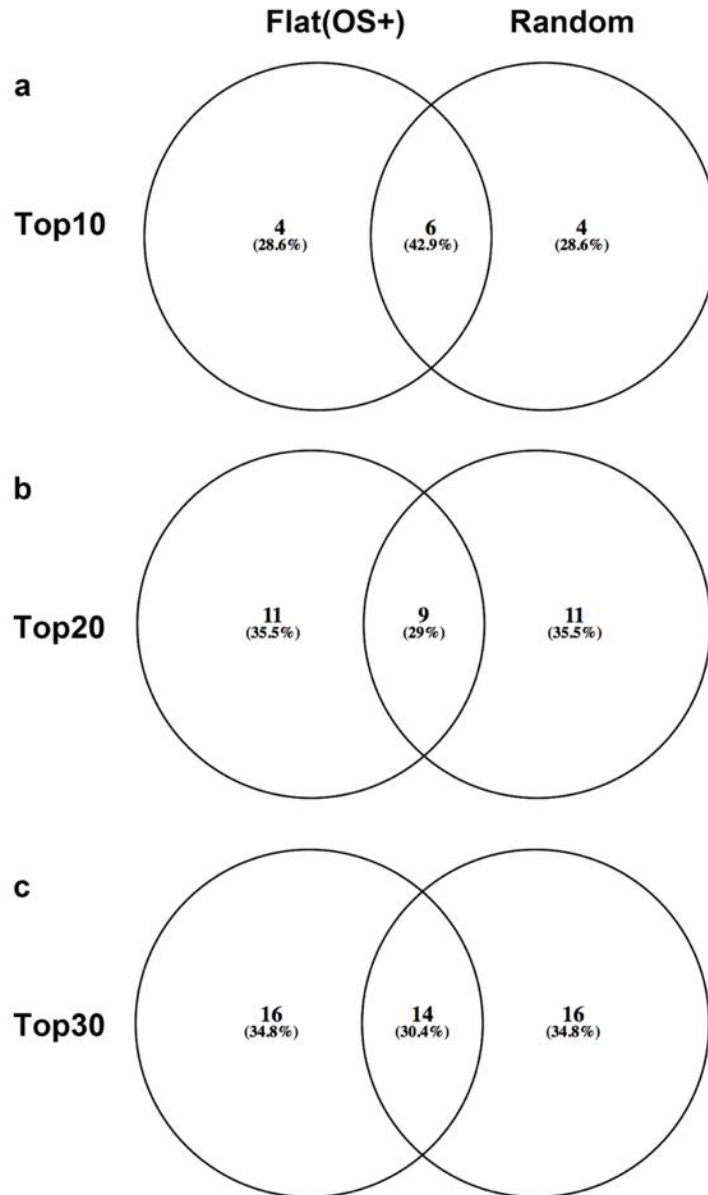

**Supplementary Fig. 3.** Enrichment pathways in the flat (OS+) and random groups. **(a)** Top 10 enriched pathways in the flat (OS+) and random groups. **(b)** Top 20 enriched pathways in the flat (OS+) and random groups. **(c)** Top 30 enriched pathways in the flat (OS+) and random groups.

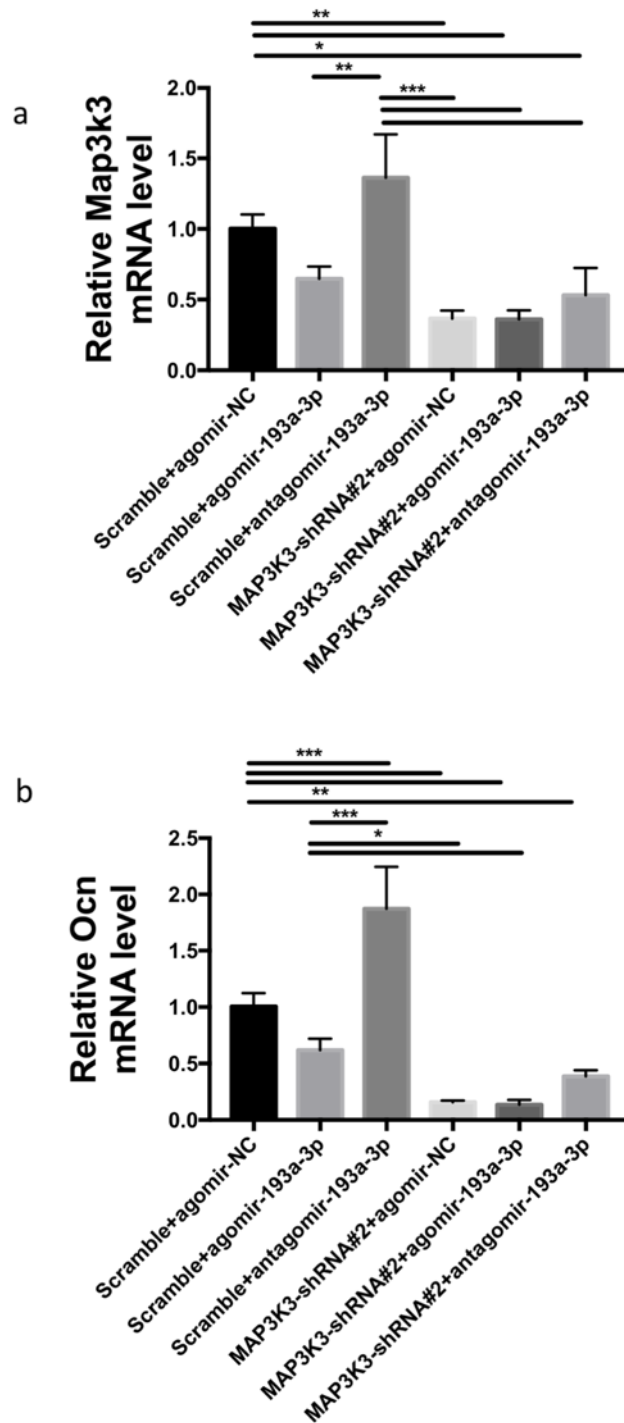

**Supplementary Fig. 4.** MAP3K3 was downregulated by co-transfection of lentivirus-shRNA with agomir-193a-3p or antagomir-193a-3p. **(a)** mRNA level of *Map3k3* following co-transfection of lentivirus-shRNA with agomir-193a-3p or antagomir-193a-3p. **(b)** mRNA level of *Ocn* upon co-transfection of lentivirus-shRNA with agomir-193a-3p or antagomir-193a-3p. Results are presented as means  $\pm$  SEM (n = 3). Samples were subjected to one-way ANOVA with Tukey's *post hoc* test. Significant differences are denoted by \* $p < 0.05$ , \*\* $p < 0.01$ , and \*\*\* $p < 0.001$ .

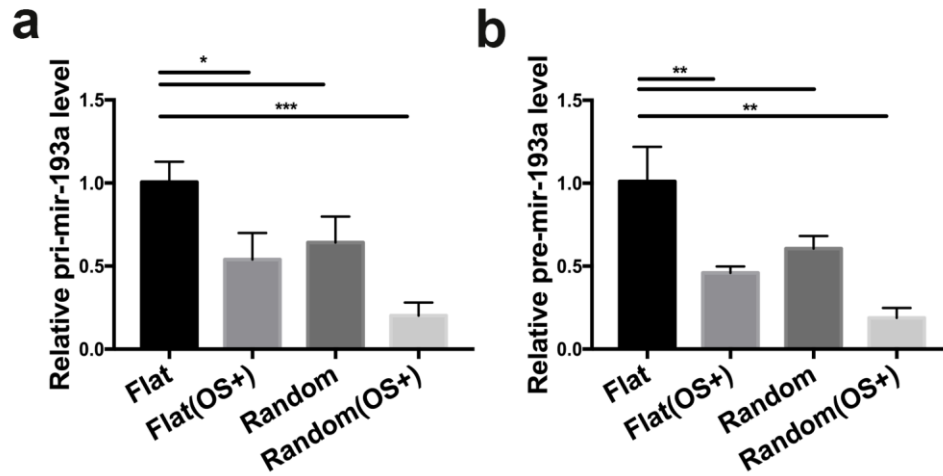

**Supplementary Fig. 5.** Expression levels of mir-193a and miR-193a-3p. Pri-mir-193a (a) and pre-mir-193a (b) expression in hBMSCs in the flat (OS+), random, and random (OS+) groups at 14 days. Results are means  $\pm$  SEM (n = 3). Samples were subjected to one-way ANOVA with Tukey's *post hoc* test. Significant differences are denoted by \* $p < 0.05$ , \*\* $p < 0.01$ , and \*\*\* $p < 0.001$ .

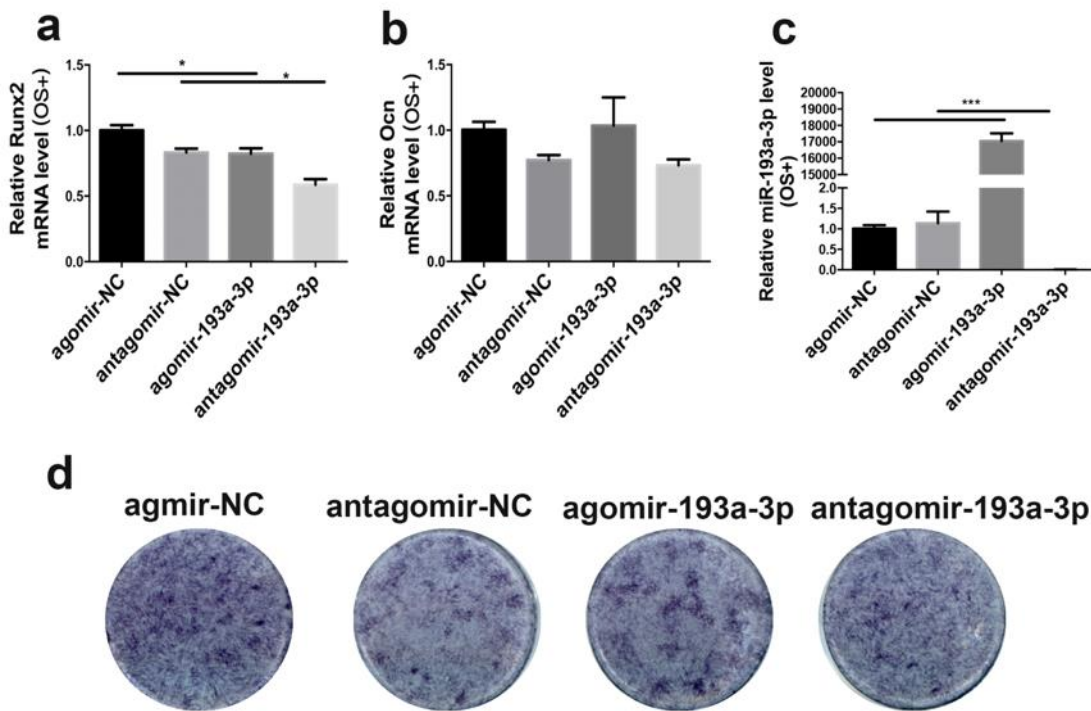

**Supplementary Fig. 6.** The promotion of osteogenic differentiation of hBMSCs by low hsa-miR-193a-3p expression was blocked by osteogenic differentiation medium (OS). Effect of agomir-193a-3p, antagomir, or their corresponding scrambled controls on the *Runx2* (a) and *Ocn* (b) mRNA levels in hBMSCs cultured in osteogenic differentiation medium. (c) The expression of miR-193a-3p at 48 hours post-transfection in osteogenic medium. Gross images (d) of ALP staining of hBMSCs treated with agomir-193a-3p, antagomir, or their corresponding scrambled controls for 5 days in osteogenic differentiation medium. Results are means  $\pm$  SEM (n = 3). Samples were subjected to one-way ANOVA with Tukey *post hoc* test. Significant differences are denoted by \* $p < 0.05$ .

**Supplementary Table 1** Flat (OS+) group on KEGG pathway enrichment

| Rank | KEGG PATHWAY                                         | <i>p</i> value |
|------|------------------------------------------------------|----------------|
| 1    | AGE-RAGE signaling pathway in diabetic complications | 8.03395E-11    |
| 2    | Amoebiasis                                           | 2.34792E-09    |
| 3    | Pathways in cancer                                   | 2.47231E-09    |
| 4    | Protein digestion and absorption                     | 1.38926E-07    |
| 5    | Focal adhesion                                       | 1.89465E-07    |
| 6    | PI3K-Akt signaling pathway                           | 2.9292E-07     |
| 7    | cGMP-PKG signaling pathway                           | 2.77904E-06    |
| 8    | Hippo signaling pathway                              | 3.60329E-06    |
| 9    | Rap1 signaling pathway                               | 4.79686E-06    |
| 10   | @@Wnt signaling pathway                              | 5.8927E-06     |
| 11   | TNF signaling pathway                                | 6.36061E-06    |
| 12   | Small cell lung cancer                               | 1.26062E-05    |
| 13   | Proteoglycans in cancer                              | 3.62616E-05    |
| 14   | ECM-receptor interaction                             | 4.00082E-05    |
| 15   | Melanogenesis                                        | 4.87509E-05    |
| 16   | Renin secretion                                      | 0.000144529    |
| 17   | HTLV-I infection                                     | 0.00018663     |
| 18   | Hypertrophic cardiomyopathy (HCM)                    | 0.000198927    |
| 19   | Calcium signaling pathway                            | 0.000253525    |
| 20   | Cytokine-cytokine receptor interaction               | 0.000268305    |



|    |                                                                         |             |
|----|-------------------------------------------------------------------------|-------------|
| 21 | Platelet activation                                                     | 0.000272684 |
| 22 | Basal cell carcinoma                                                    | 0.000273639 |
| 23 | Signaling pathways regulating pluripotency of stem cells                | 0.000293983 |
| 24 | Prolactin signaling pathway                                             | 0.000321215 |
| 25 | FoxO signaling pathway                                                  | 0.00056033  |
| 26 | Colorectal cancer                                                       | 0.00056603  |
| 27 | Jak-STAT signaling pathway                                              | 0.000751165 |
| 28 | Vascular smooth muscle contraction                                      | 0.000833465 |
| 29 | @@TGF-beta signaling pathway                                            | 0.000891458 |
| 30 | Phospholipase D signaling pathway                                       | 0.001010707 |
| 31 | Chagas disease (American trypanosomiasis)                               | 0.001014956 |
| 32 | Prostate cancer                                                         | 0.001296148 |
| 33 | Dilated cardiomyopathy                                                  | 0.001296148 |
| 34 | Arrhythmogenic right ventricular cardiomyopathy (ARVC)                  | 0.00161441  |
| 35 | Long-term depression                                                    | 0.002105404 |
| 36 | Oxytocin signaling pathway                                              | 0.0022199   |
| 37 | Inflammatory mediator regulation of TRP channels                        | 0.002389074 |
| 38 | Insulin signaling pathway                                               | 0.002481464 |
| 39 | Cell adhesion molecules (CAMs)                                          | 0.00304302  |
| 40 | Glucagon signaling pathway                                              | 0.003064878 |
| 41 | Hepatitis B                                                             | 0.003527827 |
| 42 | Glycosaminoglycan biosynthesis - chondroitin sulfate / dermatan sulfate | 0.003573867 |
| 43 | MicroRNAs in cancer                                                     | 0.003815343 |
| 44 | Alanine, aspartate and glutamate metabolism                             | 0.004166299 |
| 45 | p53 signaling pathway                                                   | 0.004305864 |
| 46 | Endometrial cancer                                                      | 0.004545765 |
| 47 | @@Axon guidance                                                         | 0.004807961 |
| 48 | cAMP signaling pathway                                                  | 0.005000776 |
| 49 | Chronic myeloid leukemia                                                | 0.005710115 |

|    |                                                            |             |
|----|------------------------------------------------------------|-------------|
| 50 | Ras signaling pathway                                      | 0.005867679 |
| 51 | Glutamatergic synapse                                      | 0.006025044 |
| 52 | Adherens junction                                          | 0.006109194 |
| 53 | Glycosaminoglycan biosynthesis - heparan sulfate / heparin | 0.006327502 |
| 54 | Circadian entrainment                                      | 0.006613366 |
| 55 | Acute myeloid leukemia                                     | 0.006821143 |
| 56 | Thyroid hormone signaling pathway                          | 0.007390009 |
| 57 | Phosphatidylinositol signaling system                      | 0.007826669 |
| 58 | Neurotrophin signaling pathway                             | 0.0081553   |
| 59 | Estrogen signaling pathway                                 | 0.00826607  |
| 60 | Regulation of actin cytoskeleton                           | 0.008699829 |
| 61 | EGFR tyrosine kinase inhibitor resistance                  | 0.009509377 |
| 62 | AMPK signaling pathway                                     | 0.009865073 |
| 63 | Folate biosynthesis                                        | 0.009906553 |
| 64 | HIF-1 signaling pathway                                    | 0.010210427 |
| 65 | Adrenergic signaling in cardiomyocytes                     | 0.010520728 |
| 66 | Longevity regulating pathway - multiple species            | 0.011256282 |
| 67 | Glioma                                                     | 0.012024199 |
| 68 | Long-term potentiation                                     | 0.012828241 |
| 69 | mTOR signaling pathway                                     | 0.012892067 |
| 70 | Central carbon metabolism in cancer                        | 0.013669221 |
| 71 | Type II diabetes mellitus                                  | 0.013679424 |
| 72 | Mucin type O-Glycan biosynthesis                           | 0.013964859 |
| 73 | Gap junction                                               | 0.014120424 |
| 74 | Rheumatoid arthritis                                       | 0.014120424 |
| 75 | Viral carcinogenesis                                       | 0.014745751 |
| 76 | Malaria                                                    | 0.014751431 |
| 77 | Cholinergic synapse                                        | 0.015087782 |
| 78 | Measles                                                    | 0.015958247 |

|     |                                           |             |
|-----|-------------------------------------------|-------------|
| 79  | Fc gamma R-mediated phagocytosis          | 0.017376862 |
| 80  | Inositol phosphate metabolism             | 0.017418218 |
| 81  | Tight junction                            | 0.018743836 |
| 82  | Longevity regulating pathway              | 0.019189097 |
| 83  | Toxoplasmosis                             | 0.019719788 |
| 84  | Glycerophospholipid metabolism            | 0.020143064 |
| 85  | Leukocyte transendothelial migration      | 0.020580209 |
| 86  | Gastric acid secretion                    | 0.020655115 |
| 87  | Platinum drug resistance                  | 0.021818789 |
| 88  | Endocrine resistance                      | 0.022149211 |
| 89  | Non-small cell lung cancer                | 0.023848057 |
| 90  | Neuroactive ligand-receptor interaction   | 0.025130651 |
| 91  | Bacterial invasion of epithelial cells    | 0.02557288  |
| 92  | Arginine biosynthesis                     | 0.025674019 |
| 93  | Cell cycle                                | 0.026308431 |
| 94  | Retrograde endocannabinoid signaling      | 0.026567737 |
| 95  | Glycerolipid metabolism                   | 0.028650095 |
| 96  | Osteoclast differentiation                | 0.034291654 |
| 97  | Insulin resistance                        | 0.037125789 |
| 98  | Herpes simplex infection                  | 0.037347936 |
| 99  | ABC transporters                          | 0.03959027  |
| 100 | Pancreatic cancer                         | 0.042099115 |
| 101 | @@Sphingolipid metabolism                 | 0.047793707 |
| 102 | NF-kappa B signaling pathway              | 0.048673565 |
| 103 | Hippo signaling pathway -multiple species | 0.049718469 |

---

**Supplementary Table 2** Random group on KEGG pathway enrichment

| Rank | KEGG PATHWAY                                           | <i>p</i> value |
|------|--------------------------------------------------------|----------------|
| 1    | Protein digestion and absorption                       | 1.79358E-09    |
| 2    | ECM-receptor interaction                               | 3.47032E-05    |
| 3    | Focal adhesion                                         | 0.000192531    |
| 4    | Pathways in cancer                                     | 0.000218548    |
| 5    | MAPK signaling pathway                                 | 0.000358614    |
| 6    | Hippo signaling pathway                                | 0.000429406    |
| 7    | Arrhythmogenic right ventricular cardiomyopathy (ARVC) | 0.000835105    |
| 8    | PI3K-Akt signaling pathway                             | 0.001324168    |

|    |                                                      |             |
|----|------------------------------------------------------|-------------|
| 9  | Glycerolipid metabolism                              | 0.001889905 |
| 10 | Rap1 signaling pathway                               | 0.003594875 |
| 11 | AGE-RAGE signaling pathway in diabetic complications | 0.003689107 |
| 12 | Melanoma                                             | 0.004006342 |
| 13 | HTLV-I infection                                     | 0.004116399 |
| 14 | Glutathione metabolism                               | 0.00740639  |
| 15 | MicroRNAs in cancer                                  | 0.007735294 |
| 16 | Hematopoietic cell lineage                           | 0.008539659 |
| 17 | Basal cell carcinoma                                 | 0.008888057 |
| 18 | @@Pentose phosphate pathway                          | 0.009568414 |
| 19 | NF-kappa B signaling pathway                         | 0.011075592 |
| 20 | Arachidonic acid metabolism                          | 0.013062871 |
| 21 | Cytokine-cytokine receptor interaction               | 0.01417285  |
| 22 | p53 signaling pathway                                | 0.018314119 |
| 23 | TNF signaling pathway                                | 0.021641554 |
| 24 | Glycosphingolipid biosynthesis - ganglio series      | 0.022460558 |
| 25 | Bladder cancer                                       | 0.02264654  |
| 26 | Complement and coagulation cascades                  | 0.027817876 |
| 27 | Platelet activation                                  | 0.031444199 |
| 28 | Hypertrophic cardiomyopathy (HCM)                    | 0.032305404 |
| 29 | TGF-beta signaling pathway                           | 0.033489632 |
| 30 | Regulation of actin cytoskeleton                     | 0.034055393 |
| 31 | Ovarian steroidogenesis                              | 0.036618953 |
| 32 | Rheumatoid arthritis                                 | 0.038477357 |
| 33 | Prostate cancer                                      | 0.03978713  |
| 34 | Dilated cardiomyopathy                               | 0.03978713  |
| 35 | Osteoclast differentiation                           | 0.040366132 |
| 36 | FoxO signaling pathway                               | 0.042536874 |
| 37 | Terpenoid backbone biosynthesis                      | 0.042803404 |

|    |                                                            |             |
|----|------------------------------------------------------------|-------------|
| 38 | Transcriptional misregulation in cancer                    | 0.043539533 |
| 39 | Biosynthesis of unsaturated fatty acids                    | 0.046111295 |
| 40 | Renin-angiotensin system                                   | 0.046111295 |
| 41 | Glycerophospholipid metabolism                             | 0.048173965 |
| 42 | Glycosaminoglycan biosynthesis - heparan sulfate / heparin | 0.049509773 |

---

## Materials and Methods

**Fabrication of electrospun PLLA nanofiber.** PLLA powder (0.7 g) was added to 10 mL of trifluoroethanol and stirred overnight. The solution was ejected from a 20 mL syringe with a steel needle (inner diameter: 0.5 mm), using a programmable syringe pump, into a conventional electrospinning apparatus (Elite; Ucalery, Beijing, China) at a rate of 0.7 mL/h. High-voltage equipment was used to provide a constant voltage (16 kV) to the tip of the needle when the fluid was ejected, and a metal plate ( $20 \times 30 \text{ cm}^2$ ) was used as a collector at a distance of 15 cm from the tip of the needle, to obtain randomly arranged PLLA nanofibers (random group). To fabricate flat PLLA films (flat group), the PLLA polymer solution was cast on a flat glass plate at a thickness of 75  $\mu\text{m}$ , and dried at 40°C for 6 h. The samples (PLLA nanofibers and flat films) were kept in a vacuum oven (DZF-6210; Blue Pard, Shanghai, China) at room temperature for 2 weeks to remove residual solvent. The nanotopography of the films was imaged by scanning electron microscopy (SU-8010; Hitachi, Tokyo, Japan), at an accelerating voltage of 15 kV.

**Gel-MA hydrogel fabrication and rheological characterization.** Gel-MA, an alterable elastic hydrogel, is commonly used as a mechanical model for cell culture. Briefly, Gel powder was added to phosphate-buffered saline (PBS) at 50°C and stirred until fully dissolved at 10% (w/v). Methacrylic anhydride was added to this solution at a rate of 0.3 mL/minute while stirring at 50°C until the target volume was reached. The mixture was next dialyzed against distilled water at 40°C for 2 weeks using 7000 molecular-weight (MW) cutoff dialysis tubing. The water was changed every day to remove salts and methacrylic acid. Subsequently, the Gel-MA solution was lyophilized and stored at -80°C for future use. Lyophilized Gel-MA at 3%, 5%, 7%, 10% and 20% (w/v) was dissolved in human mesenchymal stem cell basal medium containing 0.5% (w/v) 2-hydroxy-4'-(2-hydroxyethoxy)-2-methylpropiophenone (Aladdin, Shanghai, China) at 50°C to prepare a pre-polymer solution. Two milliliters of the mixture were added to a 35-mm-diameter dish and exposed to ultraviolet (UV) light for 10 min. The rheological properties of the Gel-MA hydrogel were determined using a HAAKE RheoWin MARS 40 (Thermo Fisher, Waltham, MA, USA). Gel-MA hydrogels were placed within 35-mm-diameter parallel plates separated by 1.00 mm. Amplitude sweeps were conducted from  $\tau_0$  0.01000–1,000 Pa ( $f = 1.000 \text{ Hz}$ ,  $T = 37^\circ\text{C}$ ). Frequency sweeps were performed at a constant strain from  $\tau_0$  0.03000–4 Pa according to the Gel-MA hydrogel concentration and frequencies of 0.1–14.00 Hz at 37°C.

**Cell culture and seeding on PLLA nanofilms, Gel-MA, or six-well plates.** The hBMSCs used in this research were supplied by Cyagen Biosciences Inc. (Guangzhou, China); they were obtained as surgical waste material from normal male donors aged 20–30 years. The culture medium was human mesenchymal stem cell-basal medium containing 5% (w/v) mesenchymal stem cell-qualified fetal bovine serum (FBS), 10  $\mu\text{g/mL}$  (w/v) L-glutamine, and 100 IU/mL penicillin-streptomycin (Cyagen Biosciences Inc.). The medium was changed every 2–3 days. At 80–90% confluence, hBMSCs were detached with

0.25% (w/v) trypsin/ ethylenediaminetetraacetic acid (EDTA) (Gibco, Grand Island, NY, USA) and subcultured at a density of  $5 \times 10^5$  cells per T75 flask, or plated onto six-well plates at a density of  $1 \times 10^5$  cells per well. Fourth-passage hBMSCs were used in this study. PLLA nanofiber scaffolds and flat polymer films were cut into  $4 \times 4$  cm sections and attached to the cap of centrifuge tubes (50 mL), as in our previous study. After placement within into six-well plates, these materials were sterilized with radiation for 12 h, and washed three times with PBS. Cells cultured on flat polymer films in OS comprising 50 mg/mL ascorbic acid, 10 mM sodium  $\beta$ -glycerol phosphate, and  $10^{-8}$  M dexamethasone were used as flat (OS+) and random (OS+) positive controls. Negative controls were cultured on flat polymer films in normal culture medium without osteoinductive supplements.

**Cell morphology and cytoskeletal remodeling.** Morphological changes and cytoskeletal remodeling of hBMSCs were imaged by confocal microscopy. hBMSCs cultured on nanofibers for 4 h, and hBMSCs cultured on Gel-MA for 24 h, were washed with PBS, fixed in 4% (w/v) paraformaldehyde for 15 min, washed twice in PBS, permeabilized with 0.2% (w/v) Triton X-100 for 10 min, and blocked with 5% (w/v) bovine serum albumin (BSA) for 60 min at room temperature. The flat or random PLLA membranes were stained with tetramethylrhodamine isothiocyanate (TRITC) phalloidin (100 nM; Solarbio, Shanghai, China) 40 min at room temperature, followed by counterstaining with 1  $\mu$ g/mL 4',6-diamidino-2-phenylindole (DAPI) (blue) for 10 min. The cells were visualized by confocal laser scanning microscopy (TCS SP8; Leica, Wetzlar, Germany). Image Pro Plus software (Media Cybernetics, Silver Spring, MD, USA) was used to evaluate the effect of Gel-MA concentration on cell morphology. The shape of the cell and nucleus of at least 30 cells per group were analyzed.

**Quantitative reverse transcriptase-polymerase chain reaction.** The PLLA nanofilms or Gel-MA loaded with cells for in vitro culture were prepared as described previously. Total RNA of cells cultured on PLLA nanofilms was extracted using TRIzol reagent (Invitrogen, Carlsbad, CA, USA). Total RNA of the cells loaded on Gel-MA was extracted using the RNAprep Pure Cell Kit (DP430; Tiangen, Beijing, China). mRNA was reverse-transcribed into cDNA using the PrimeScript<sup>®</sup> RT Reagent Kit (TaKaRa, Tokyo, Japan) at 37°C for 15 min and 85°C for 5 s according to the manufacturer's protocol. The synthesized cDNA samples were subjected to qRT-PCR to determine the expression levels of *Runx2*, *Ocn*, *Map3k3*, *Bsp*, *Erk1*, *Jnk*, and *Erk5* using SYBR Green Master Mix (Roche Diagnostics Ltd., Mannheim, Germany) and a 7500 ABI Real-Time PCR System (Applied Biosystems, Foster City, CA, USA). Relative gene expression levels were calculated using the  $2^{(-\Delta\Delta CT)}$  method. Briefly, the mRNA and miR-193a-3p data were normalized to the expression of glyceraldehyde-3-phosphate dehydrogenase (GAPDH) and U6 (U6 spliceosomal RNA), respectively. The following primer sequences were used for qRT-PCR: *Gapdh* (5'-CCTCTGACTTCAACAGCGAC-3', 5'-TCCTCTTGTGCTCTTGCTGG-3'), *Runx2* (5'-TCACCTCAGGCATGTCCCTCGGTAT-3', 5'-TGGCTTCCATCAGCGTCAACACC-3'), *Ocn* (5'-CACTCCTCGCCCTATTGGC-3', 5'-CCCTCCTGCTTGGACACAAAG-3'), *Map3k3* (5'-GGCGAATTATAGCGTTCAGCC-3', 5'-GGGACAACAGCAATATCCTAAGG-3') *Bsp* (5'-GGAGACTTCAAATGAAGGAG-3', 5'-CAGAAAGTGTGGTATTCTCAG-3'), *Erk1* (5'-ACTCCAAAGCCCTTGACCTG-3', 5'-GACTGGCCCACCTCATCC-3') *Jnk* (5'-CCACCACCAAAGATCCCTGA-3', 5'-GCTGCACCTAAAGGAGAGGG-3'), *Erk5* (5'-GCAGGTGGCCATCAAGAAGA-3', 5'-TCCAGGACCACGTAGACAGA-3'), *U6* (5'-CGCTTCGGCAGCACATATAC-3', 5'-TTCACGAATTTGCGTGTTCATC-3'), and hsa-miR-193a-3p (5'-ATGCTCAAACCTGGCCTACAAAG-3', 5'-TATGGTTGTTCTGCTCTCTGTCTC-3').

**miRNA array, gene array and bioinformatics analysis.** Total RNA, including small RNAs, from hBMSCs cultured for 14 days on PLLA nanofibers (random) and flat polymer films with (flat OS+) or without OS (flat), was extracted using TRIzol reagent (Invitrogen) and purified using the mirVana miRNA Isolation Kit (Ambion, Austin, TX, USA) according to the manufacturer's protocol. miRNA profiling was performed using an Agilent miRNA array (CapitalBio Corp, Beijing, China). The Agilent array has eight identical arrays per slide (8 × 60 K format), with each array containing probes interrogating 2,549 human mature miRNAs from miRBase R21.0 ([www.mirbase.org](http://www.mirbase.org)). Each miRNA was detected by probes repeated 30 times. The array also contained 2,164 Agilent control probes. The miRNA profiling was performed using the Agilent miRNA array. The Agilent array was designed with eight identical arrays per slide (8 × 60 K format), with each array containing probes interrogating 2,549 human mature miRNAs from miRBase R21.0. Each miRNA was detected by probes repeated 30 times. The array also contained 2,164 Agilent control probes.

Briefly, 200 ng of total RNA were used to synthesize first-strand cDNA followed by double-stranded cDNA using a Message Amp Premier RNA Amplification Kit and PCR apparatus (MJ, PTC-225; Ambion). Biotin-labeled cRNA was synthesized using a MessageAmp Premier RNA Amplification Kit (Ambion). The concentration of cRNA was measured using a NanoDrop ND-1000 instrument, and 15 µg of fragmented cRNA was hybridized to each GeneChip Human Genome U133 Plus 2.0 Array (Affymetrix, Santa Clara, CA, USA), which contains more than 54,000 probe sets to cover over 47,000 transcripts and variants, at 45°C for 16 h (Affymetrix Hybridization Oven 640) according to the manufacturer's instructions. After hybridization, the arrays were washed, stained with streptavidin phycoerythrinonan using an Affymetrix Fluidics Station 450, and scanned using an Affymetrix Scanner 3000 7G. Three replicates of the microarray experiment were performed until high reproducibility was achieved. Each replicate comprised pooled cell lysates from three wells.

**Bioinformatics analysis.** The miRNA array data were , normalized, summarized and subjected to quality control using GeneSpring software v. 12 (Agilent). The default 90<sup>th</sup> percentile normalization method was applied for data pre-processing. To identify differentially expressed genes, we used threshold values of  $\geq 2.5$  and  $\leq -2.5$ -fold changes, and a *t*-test p-value of 0.05. The raw data were log<sub>2</sub>-transformed and median-centered by genes using the Adjust Data function of CLUSTER 3.0 software (Stanford University School of Medicine, Stanford, CA, USA), and further analyzed by hierarchical clustering and heatmaps with average linkage. We performed tree visualization in using Java TreeView (Stanford University School of Medicine). In the heatmap, red denotes high relative expression, and green low relative expression. A PCA was performed to determine the gene expression trends of the samples.

**Ontology and pathway analysis.** The number of genes potentially regulated by one miRNA ranges from several hundreds to a couple of thousand. The predicted mRNA targets of downregulated miRNAs were picked up by no less than 7 out of 12 commonly used predicting databases: miRWalk, microT v4, miRanda, mirbridge, miRDB, miRMap, miRNAMap, Pictar2, PITA, RNA22, RNAhybrid, and Targetscan. The predicted mRNA targets that overlapped with upregulated mRNAs in gene chips subjected to ontology analysis with KOBAS 3.0 software were identified to determine the enriched biological pathways regulated by the candidate downregulated miRNAs.

**miRNA transfection.** hBMSCs were cultured to 70% confluence in six-well plates in basal medium with 5% (v/v) FBS. Next, 50 nM agomir or 100 nM antagomir (GenePharma) was transfected into cells using



lipofectamine RNAi-max (Invitrogen) to potentiate or block the activity of miR-193a-3p, respectively. Negative controls (double-stranded agomir and single-stranded antagomir validated by the manufacturer to have no homology with any published human or mouse miRNA) were also performed for both reactions. At 8 h after transfection, the transfection medium was replaced with fresh complete medium. At 48 h after transfection, RNA was extracted, and qRT-PCR analysis was performed. At 72 h after transfection, proteins were extracted, and a Western blotting analysis was performed. For alkaline phosphatase (ALP) staining, the cells were subjected to transfection for 5 days.

**Western blotting.** Cells were lysed in radioimmunoprecipitation assay buffer (RIPA) lysis buffer (P0013B; Beyotime, Jiangsu, China) with protease and phosphatase inhibitors (Halt; Thermo Scientific) on ice for 30 min. Protein fractions were collected by centrifugation at 12,000 g at 4°C for 30 min. The protein concentrations were determined using a BCA Protein Assay Kit (P0012; Beyotime), and whole lysates were mixed with 6× sodium dodecyl sulfate (SDS) loading buffer (P0015F; Beyotime) at a 1:5 ratio. The samples were heated for 5 min at 100°C and, subjected to electrophoresis on SDS-polyacrylamide gels; the resolved proteins were transferred to polyvinylidene difluoride (PVDF) membranes. The membranes were blocked with 5% (w/v) BSA and incubated with specific antibodies overnight. The following antibodies were used: anti-GAPDH (1:2,500; ab9485; Abcam), anti-RUNX2 (1:1,000; 12556; Cell Signaling Technology), anti-OCN (1:500; DF12303; Affinity), anti-MAP3K3 (1:1,000; ab40756; Abcam), anti-phospho-Erk1/2 (Thr202/Tyr204) (1:1000; 9101; Cell Signaling Technology), anti-Erk1/2 (1:1,000; 9102; Cell Signaling Technology), anti-phospho-SAPK/JNK (Thr183/Tyr185) (1:500; 9255, Cell Signaling Technology), anti-SAPK/JNK (1:1,000; 9252; Cell Signaling Technology), anti-phospho-ERK5 (Thr218/Tyr220) (1:500; 3371; Cell Signaling Technology), and anti-ERK5 (1:1,000; 3372; Cell Signaling Technology). The target proteins were probed with a horseradish peroxidase (HRP)-conjugated goat anti-rabbit IgG (A0208; Beyotime) or HRP-conjugated goat anti-mouse IgG (A0216; Beyotime), and autoradiograms were performed using the cECL Western Blot Kit (CW0049; CWBio, Beijing, China).

**Alkaline phosphatase staining.** ALP in cell layers was detected as follows. Cultured cells were rinsed with PBS three times and fixed with 4% (w/v) paraformaldehyde for 15 min at room temperature. ALP staining was performed using the BCIP/NBT Alkaline Phosphatase Colour Development Kit (C3206; Beyotime) according to the manufacturer's instructions. The samples were placed in ALP substrate staining solution for 15 min and rinsed three times in deionized water. The entire procedure was protected from light.

**Luciferase reporter assay.** *Map3k3* mRNA 3'UTRs containing the miR-193a-3p-binding sequences for human *Map3k3* (NM\_203351) were amplified from human genomic DNA by PCR. Double-stranded oligonucleotides corresponding to the WT MAP3K3 3'UTR or MUT MAP3K3 3'UTR miR-193a-3p binding site in the 3'UTR of *Map3k3* were synthesized and subcloned into the GV272 reporter vector (GV272: SV40-Luciferase-MCS-Poly A; GeneChem, Shanghai, China). The miR-193a-3p recognition elements were as follows: 5'-ACCGAGGGCTTGCAGTGCAAAGCCAGGCCAGTGTTGCGCATTAA-3' (WT MAP3K3 3'UTR) and 5'-ACCGAGGGCTTGCAGTGCAAAGCCATTAAGTTGCGCATTAA-3' (MUT MAP3K3 3'UTR). Cells were seeded into a 24-well plate and co-transfected with the appropriate plasmid and miR-193a-3p agomir, antagomir, or scrambled control using Lipofectamine™ 3000 (Invitrogen). Luciferase assays were performed using the Dual-Luciferase Reporter Assay System

(E1910; Promega, Madison, WI, USA) at 48 h after transfection. Normalized luciferase activity is presented as luciferase activity ÷ Renilla luciferase activity.

**Lentivirus infection.** Lentiviruses carrying shRNA targeting human *Map3k3* and lentiviral vectors (GV493) overexpressing human *Map3k3* (NM\_203351) (GV358) were procured from GeneChem. The viruses were used to infect hBMSCs in the presence of Polybrene. Forty-eight hours later, the infected hBMSCs were cultured in medium containing puromycin for the selection of stable clones. The clones with stably knocked down or *Map3k3* overexpression was identified and validated by qPCR and western blotting. The shRNA sequences are as follows: MAP3K3 no. 1: 5'-ACCTCTTGATCTACATTACAT-3'; MAP3K3 no. 2, 5'-GTGCGAGATCCAGTTGCTAAA-3'; and the non-targeting control, 5'-TTCTCCGAACGTGTCACGT-3'.

**Alizarin red staining.** Cells transfected with lentivirus were seeded in six-well plates. After 21 days, the cells were fixed in 70% (v/v) ice-cold ethanol for 30 min and rinsed with double-distilled H<sub>2</sub>O. The cells were stained with 40 mM Alizarin red S (pH 4.0; Sigma-Aldrich, St. Louis, MO, USA) for 15 min with gentle agitation. Finally, the cells were rinsed five times with double-distilled H<sub>2</sub>O, and then for 15 min with 1× PBS with gentle agitation.

#### **Animals and surgical procedures.**

24 male Sprague-Dawley rats (6 weeks old) were purchased from the Beijing Vital River Laboratory Animal Technology Co., Ltd. (Beijing, China), which were divided into 4 groups at two time points (6 samples per group). All animal surgical procedures were approved by the Institutional Animal Care and Use Committee of Peking University Health Science Center. All procedures were performed under general anesthesia by intraperitoneal injection of pentobarbital (50 mg/kg body weight). The rats were randomly divided into the random, scrambled, miR-193a-3p agomir and miR-193a-3p antagomir groups. Surgical procedures were performed under sterile conditions. A 15–20 mm incision was made on the middle of the calvarium, and a 5-mm-diameter osteotomy defect was created at the lateral side of the cranial sagittal suture using a trephine bur with sterile saline irrigation. The sites were covered by a PLLA membrane, and lyophilized with H<sub>2</sub>O, scrambled agomir, miR-193a-3p agomir, and miR-193a-3p antagomir. The surgical field was closed in the muscular layer, followed by the external skin layer, using 5-0 synthetic resorbable sutures.

**Micro-computed tomography.** At 4 and 8 weeks post-operation, calvaria samples were harvested, fixed in 4% (w/v) PBS formalin solution for 24 h, and stored in PBS until micro-CT scans were performed. Files were reconstructed using a modified Feldkamp algorithm, which was created using microtomographic analysis software (Inveon; Siemens, Munich, Germany). After 3D visualization, the BV and BMD were determined in the region of interest (ROI).

**Histological Analysis.** Tissue processing and sectioning were carried out as previously described<sup>[22]</sup>. Briefly, tissue samples were fixed in 10% neutral buffered formalin for 7 d, decalcified and dehydrated according to standard protocols, embedded in paraffin and sectioned at 5 μm thickness. Hematoxylin and eosin (H&E) staining and Masson's staining were performed separately on tissue sections, according to the manufacturer's protocols, and images were captured under light microscope (CX21, Olympus, Japan).

**Statistical analysis.** For each data set, three independent experiments in triplicates were performed to confirm the replicability of the experimental data, but only the results of one representative experiment was presented. We utilized Shapiro-Wilks test to evaluate whether the data is normally distributed before parametric statistical analysis. Data are presented as means  $\pm$  standard deviation (SD). Comparisons between two groups were carried out by two-tailed unpaired Student's *t*-test. For multiple-group comparisons (at different time points), one-way and two-way analyses of variance (ANOVA) were used to evaluate whether differences were significant. *Post hoc* analysis using Bonferroni correction was performed.
